# Supplementary material for: Central Angiotensin II type 1 receptor deficiency alleviates renal fibrosis by reducing sympathetic nerve discharge in nephrotoxic folic acid–induced chronic kidney disease
Source: PeerJ. 2024 Sep 26;12:e18166. doi: 10.7717/peerj.18166 (PMC11439387; doi:10.7717/peerj.18166)
Supplement: Supplemental Information 2 [file peerj-12-18166-s002.xlsx]

## Sheet: Figure 1
	Fig.1A % area of kidney fibrosis						Fig.1B Kidney Co I mRNA						Fig.1C Renal SNA (HZ)						Fig.1D Renal NE (pg/mg)
Number	sham	FA at day7	FA at day14	FA at day28		Number	sham	FA at day7	FA at day14	FA at day28		Number	sham	FA at day7	FA at day14	FA at day28		Number	sham	FA at day7	FA at day14	FA at day28
1	1.2	11.463	22.34	33.43		1	1	1.4	2.1	2.5		1	5.453	7.463	14.46	17.23		1	0.3	0.58	0.66	0.92
2	2.1	13	34.5	24.934		2	1	2.3	2.9	3.3		2	4.65	9.924	15.653	18.914		2	0.21	0.68	0.81	0.89
3	0.6	15	25.77	17.435		3	1	1.8	3.4	3.6		3	3.76	10.565	16.545	20.535		3	0.29	0.83	0.93	1.04
4	1.5	13.45	27.54	35.943		4	1	2.7	3.8	2.9		4	5.35	11.454	18.922	19.643		4	0.31	0.76	1.09	1.41
5	0.9	11.99	30.34	36.843		5	1	2.2	3.6	4		5	5.098	14.9456	10.464	23.743		5	0.56	0.74	0.99	1.32
6	1.1	14.65	38.34	33.435		6	1	2.7	4	4.7		6	4.854	13.456	19.9	20.435		6	0.52	0.94	1.14	1.09
	Fig.2A PVN AGT+ cells/104 um2						Fig.2B PVN AGT mRNA（ratio to sham）					Fig.2C PVN Ang II+ cells/104 um2						Fig.2D PVN Ang II level （pg/mg protein）
Number	sham	FA at day7	FA at day14	FA at day28		Number	sham	FA at day7	FA at day14	FA at day28		Number	sham	FA at day7	FA at day14	FA at day28		Number	sham	FA at day7	FA at day14	FA at day28
1	2.31	5.67	7.876	11.2334		1	1	1.2	2.3	3.4		1	1.034	1.45	2.23	3.54		1	38	66	70	78
2	3.12	7.82	5.645	5.6		2	1	1	2.5	2.3		2	0.924	2.543	3.34	3.87		2	45	58	46	84
3	1.98	5.78	5.97	9.64		3	1	1.6	2.7	2.9		3	1.123	2.56	2.32	4.98		3	43	76	73	79
4	2.54	5.61	9.35	5.34		4	1	2.1	2.2	3		4	1.54	1.53	4.4	3.91		4	31	59	100	107
5	2.9	4.23	4.78	9.656		5	1	1.3	2.8	2.2		5	1.3546	2.56	3.93	4.01		5	29	58	84	90
6	1.3	8.576	10.77	5.99		6	1	1.5	3	2.5		6	0.657	4.45	4.987	4.99		6	28	60	58	75
							Fig.3D Renal SNA (HZ)						Fig.3E Renal NE (pg/mg)						Fig.3F % area of kidney fibrosis						Fig.3G Kidney Co I mRNA
Fig.3C PVN AT1a mRNA (ratio to vector)							sham		FA				sham		FA				sham		FA				sham		FA
Number	vector	AAV-Cre				Number	vector	AAV-Cre	vector	AAV-Cre		Number	vector	AAV-Cre	vector	AAV-Cre		Number	vector	AAV-Cre	vector	AAV-Cre		Number	vector	AAV-Cre	vector	AAV-Cre
1	1	0.02				1	5.6	4.3	18	7.6		1	0.45	0.4	1.39	0.81		1	9	7.2	32	7.2		1	0.3	0.8	1	0.4
2	1	0.04				2	4.1	5.3	26	5.6		2	0.48	0.5	0.92	0.48		2	6.8	4.8	27	6.3		2	0.7	0.4	1	0.1
3	1	0.08				3	3.8	3.9	23	8.4		3	0.43	0.49	1.32	0.51		3	5.6	5.8	36	4.9		3	0.4	0.3	1	0.3
4	1	0.04				4	5.9	5.3	21	4.1		4	0.52	0.29	1.65	1.01		4	7.9	6.9	42	7.4		4	0.3	0.6	1	0.3
5	1	0.05				5	4.2	3.6	14	3.9		5	0.42	0.49	1.18	0.43		5	5.4	7.9	23	5.9		5	0.4	0.3	1	0.8
6	1	0.07				6	5	4	16	3.8		6	0.6	0.33	1.08	0.36		6	4.1	8.1	29	6.1		6	0.6	0.2	1	0.3
	Fig.4B % Renal NE (pg/mg)						Fig.4C % area of kidney fibrosis						Fig.4D Kidney Co I Mrna
	FA Ctrol		FA kdn				FA Ctrol		FA kdn				FA Ctrol		FA kdn
Number	vector	AAV-Cre	vector	AAV-Cre		Number	vector	AAV-Cre	vector	AAV-Cre		Number	vector	AAV-Cre	vector	AAV-Cre
1	1.38	0.78	0.56	0.35		1	32	7.2	9	7.2		1	1	0.4	0.3	0.8
2	1.3	0.91	0.38	0.21		2	27	6.3	6.8	4.8		2	1	0.1	0.7	0.4
3	1.65	0.32	0.53	0.32		3	36	4.9	5.6	5.8		3	1	0.3	0.4	0.3
4	1.78	0.68	0.21	0.45		4	42	7.4	7.9	6.9		4	1	0.3	0.3	0.6
5	1.34	0.45	0.38	0.65		5	23	5.9	5.4	7.9		5	1	0.8	0.4	0.3
6	1.94	0.36	0.55	0.49		6	29	6.1	4.1	8.1		6	1	0.3	0.6	0.2
	Fig.5B Cfos in CTB488(%)						Fig.5D c-fos inTH (%)
	sham		FA				sham		FA
Number	vector	AAV-Cre	vector	AAV-Cre		Number	vector	AAV-Cre	vector	AAV-Cre
1	4.3	3.9	21.2	4.2		1	9.5	8.9	43.1	12.4
2	5.3	4.2	19.8	3.9		2	10.1	8.6	45.5	14.2
3	2.9	4	18.8	4.8		3	7.3	9.3	51.2	13.9
4	3.5	3.9	20.9	5.2		4	8.2	8.1	39.5	17.1
5	4.1	4.9	17.6	5		5	7.7	7.9	42.3	13.5
6	4.9	3.1	17.8	4.9		6	9.1	7.2	49.2	18.2
	Figure S1A PVN AT1a+ mRNA（ratio to sham						Figure S1B Plasma Ang II level （pg/mg ）
Number	sham	FA at day7	FA at day14	FA at day28		Number	sham	FA at day7	FA at day14	FA at day28
1	1	1.45	0.93	0.98		1	140	136	167	170
2	1	0.98	1.12	1.23		2	156	128	136	154
3	1	1.32	1.09	0.98		3	178	176	142	165
4	1	1.23	1.23	1.31		4	134	159	163	127
5	1	1.11	0.87	0.83		5	151	158	160	170
6	1	0.89	0.91	1.01		6	139	160	158	165
