# Supplementary material for: Central Angiotensin II type 1 receptor deficiency alleviates renal fibrosis by reducing sympathetic nerve discharge in nephrotoxic folic acid–induced chronic kidney disease
Source: PeerJ. 2024 Sep 26;12:e18166. doi: 10.7717/peerj.18166 (PMC11439387; doi:10.7717/peerj.18166)
Supplement: Supplemental Information 4 — - [file peerj-12-18166-s004.xls]

## Sheet: Sheet1
ITEM TO CHECK	IMPORTANCE	CHECKLIST
EXPERIMENTAL DESIGN
Definition of experimental and control groups	E	line 72-74
Number within each group	E	line 80-81
Assay carried out by core lab or investigator's lab?	D	Investigator's lab
Acknowledgement of authors' contributions	D	line 323-332
SAMPLE
Description	E	/
Volume/mass of sample processed	D	line 157
Microdissection or macrodissection	E	macrodissection
Processing procedure	E	/
If frozen - how and how quickly?	E	line 157
If fixed - with what, how quickly?	E	NO
Sample storage conditions and duration (especially for FFPE samples)	E	line 157
NUCLEIC ACID EXTRACTION
Procedure and/or instrumentation	E	/
Name of kit and details of any modifications	E	line 156-179
Source of additional reagents used	D	line 156-179
Details of DNase or RNAse treatment	E	line 158
Contamination assessment (DNA or RNA)	E	line 160
Nucleic acid quantification	E	/
Instrument and method	E	line 159
Purity (A260/A280)	D	line 160
Yield	D	No
RNA integrity method/instrument	E	/
RIN/RQI or Cq of 3' and 5' transcripts	E	line 159
Electrophoresis traces	D	no
Inhibition testing (Cq dilutions, spike or other)	E	line 172
REVERSE TRANSCRIPTION
Complete reaction conditions	E	/
Amount of RNA and reaction volume	E	line 163
Priming oligonucleotide (if using GSP) and concentration	E	line 163
Reverse transcriptase and concentration	E	line 163-172
Temperature and time	E	line 164-165
Manufacturer of reagents and catalogue numbers	D	line 163-172
Cqs with and without RT	D*	line 172
Storage conditions of cDNA	D	line 165
qPCR TARGET INFORMATION
If multiplex, efficiency and LOD of each assay.	E	line 176
Sequence accession number	E	line 173-174
Location of amplicon	D	/
Amplicon length	E	line 173
In silico specificity screen (BLAST, etc)	E	line 174
Pseudogenes, retropseudogenes or other homologs?	D	/
Sequence alignment	D	/
Secondary structure analysis of amplicon	D	/
Location of each primer by exon or intron (if applicable)	E	NO
What splice variants are targeted?	E	NO
qPCR OLIGONUCLEOTIDES
Primer sequences	E	line 173
RTPrimerDB Identification Number	D	/
Probe sequences	D**	/
Location and identity of any modifications	E	NO
Manufacturer of oligonucleotides	D	/
Purification method	D	/
qPCR PROTOCOL
Complete reaction conditions	E	/
Reaction volume and amount of cDNA/DNA	E	line 166-167
Primer, (probe), Mg++ and dNTP concentrations	E	line 167
Polymerase identity and concentration	E	line 166-169
Buffer/kit identity and manufacturer	E	line 166-169
Exact chemical constitution of the buffer	D	/
Additives (SYBR Green I, DMSO, etc.)	E	line 167
Manufacturer of plates/tubes and catalog number	D	/
Complete thermocycling parameters	E	line 169-172
Reaction setup (manual/robotic)	D	/
Manufacturer of qPCR instrument	E	line 166-177
qPCR VALIDATION
Evidence of optimisation (from gradients)	D	/
Specificity (gel, sequence, melt, or digest)	E	line 166-177
For SYBR Green I, Cq of the NTC	E	line 172
Standard curves with slope and y-intercept	E	/
PCR efficiency calculated from slope	E	line 175
Confidence interval for PCR efficiency or standard error	D	/
r2 of standard curve	E	line 176
Linear dynamic range	E	/
Cq variation at lower limit	E	line 176
Confidence intervals throughout range	D	line 177
Evidence for limit of detection	E	line 176
If multiplex, efficiency and LOD of each assay.	E	line 176
DATA ANALYSIS
qPCR analysis program (source, version)	E	/
Cq method determination	E	line 172
Outlier identification and disposition	E	line 177-178
Results of NTCs	E	line 172
Justification of number and choice of reference genes	E	line 175
Description of normalisation method	E	line 175
Number and concordance of biological replicates	D	/
Number and stage (RT or qPCR) of technical replicates	E	line 178-179
Repeatability (intra-assay variation)	E	line 177-178
Reproducibility (inter-assay variation, %CV)	D	line 177
Power analysis	D	/
Statistical methods for result significance	E	line 182-185
Software (source, version)	E	line 182-185
Cq or raw data submission using RDML	D	/
Table 1. MIQE checklist for authors, reviewers and editors. All essential information (E) must be submitted with the manuscript. Desirable
information (D) should be submitted if available. If using primers obtained from RTPrimerDB, information on qPCR target, oligonucleotides,
protocols and validation is available from that source.
*: Assessing the absence of DNA using a no RT assay is essential when first extracting RNA. Once the sample has been validated as
RDNA-free, inclusion of a no-RT control is desirable, but no longer essential.
**: Disclosure of the probe sequence is highly desirable and strongly encouraged. However, since not all commercial pre-designed assay
vendors provide this information, it cannot be an essential requirement. Use of such assays is advised against.
